# Supplementary material for: Assessment of sea ice simulations in the CMIP5 models
Source: Copernicus journal article supplement (doi:10.5194/tc-9-399-2015), 2015-02-20
Supplement: Supplementary file [file tc-9-399-2015-supplement.pdf]

Supplement of The Cryosphere, 9, 399–409, 2015  
<http://www.the-cryosphere.net/9/399/2015/>  
doi:10.5194/tc-9-399-2015-supplement  
© Author(s) 2015. CC Attribution 3.0 License.

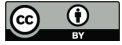

*Supplement of*

## **Assessment of sea ice simulations in the CMIP5 models**

**Q. Shu et al.**

*Correspondence to:* F. Qiao (qiaofl@fio.org.cn)

1 **Supplementary material**

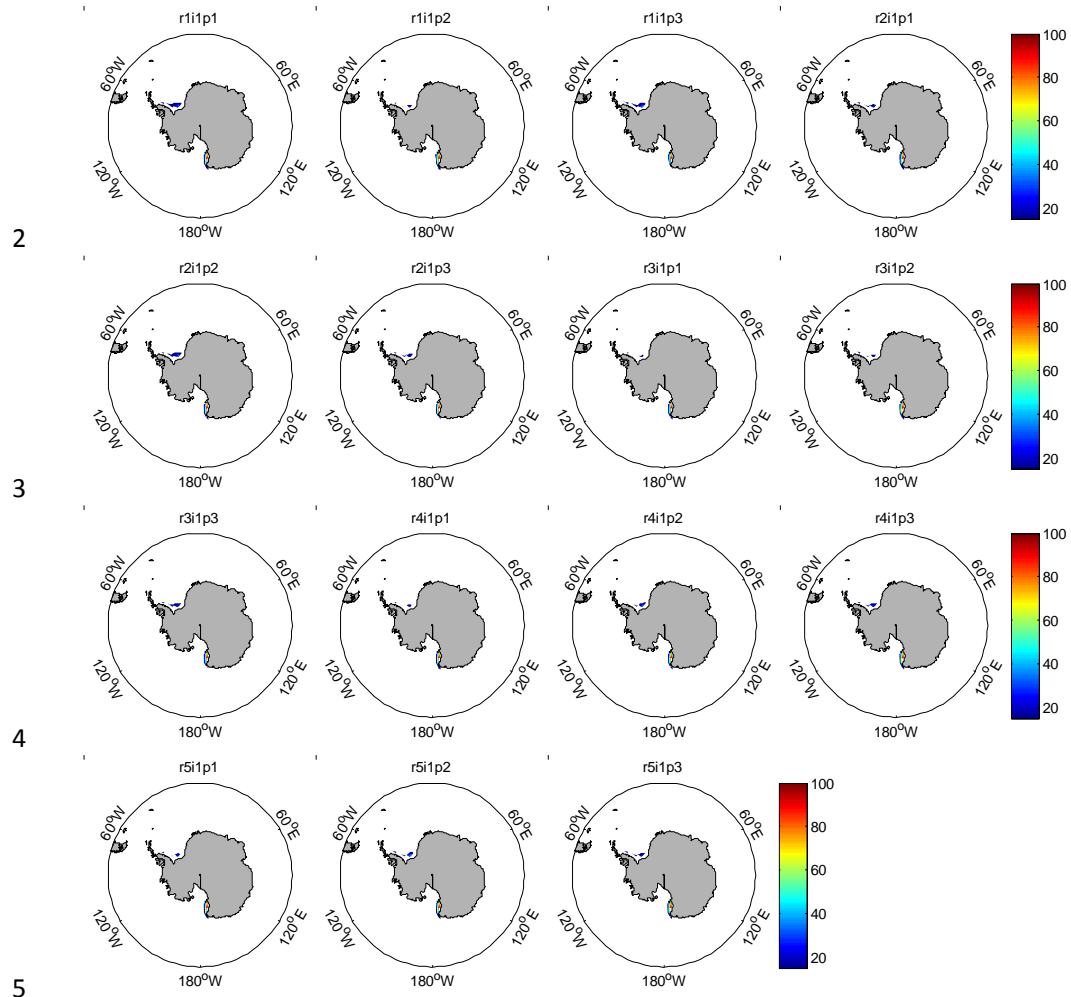

6 Figure S1. GISS-E2-R different ensemble realizations simulated Antarctic sea ice  
7 concentration in February during 1979-2005 (units: %).

8

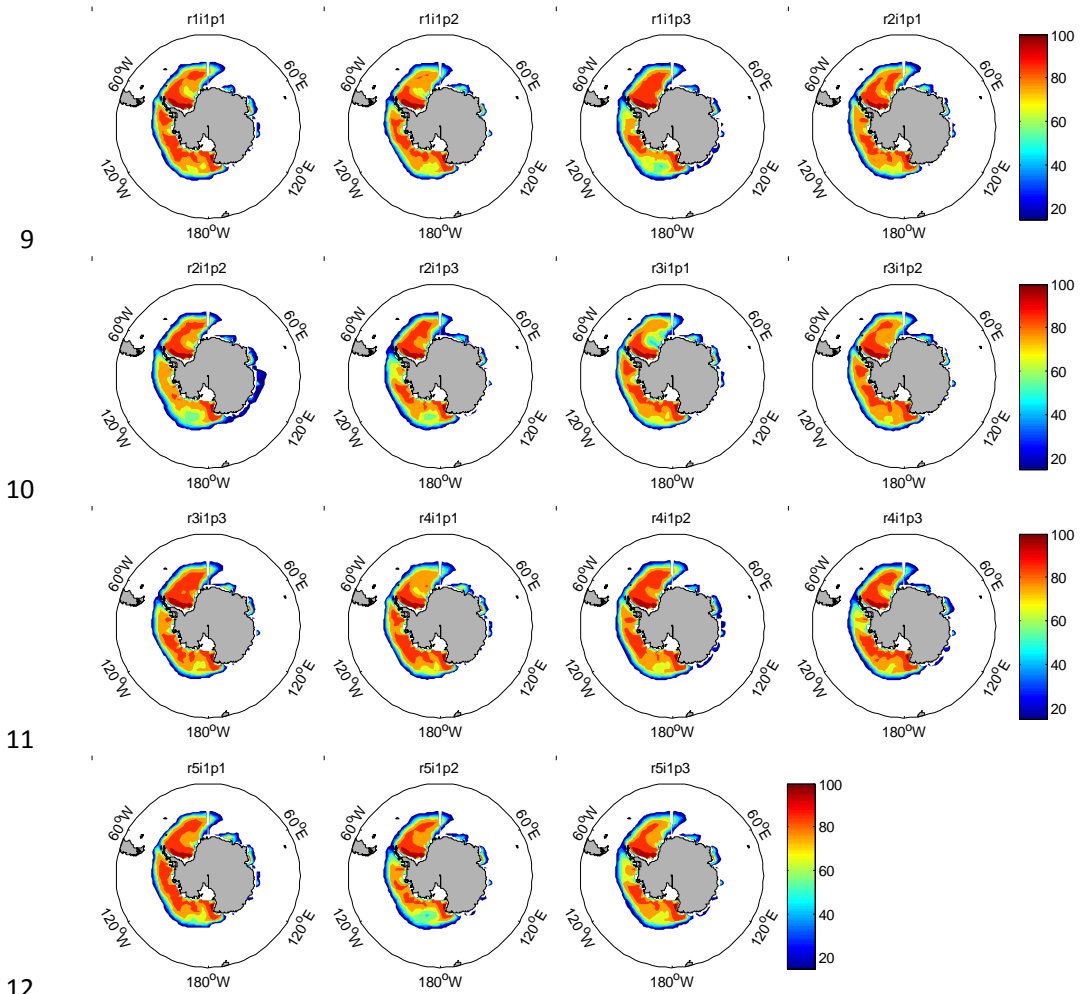

9  
10  
11  
12  
13 Figure S2. GISS-E2-R different ensemble realizations simulated Antarctic sea ice  
14 concentration in September during 1979-2005 (units: %).

15

16

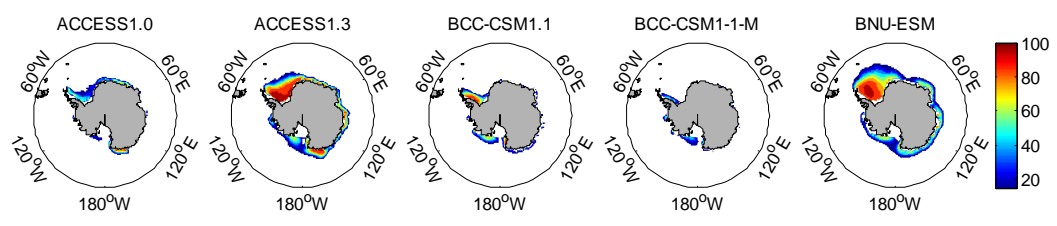

17

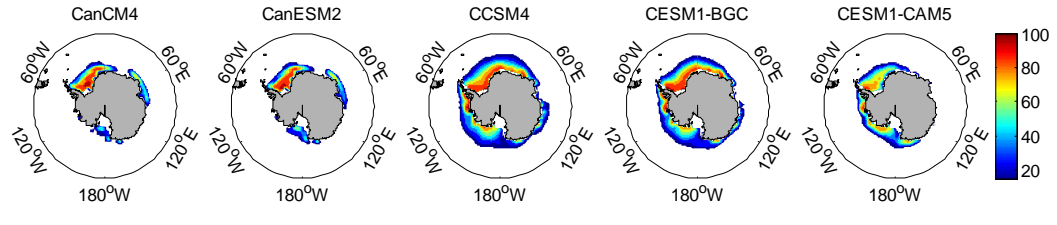

18

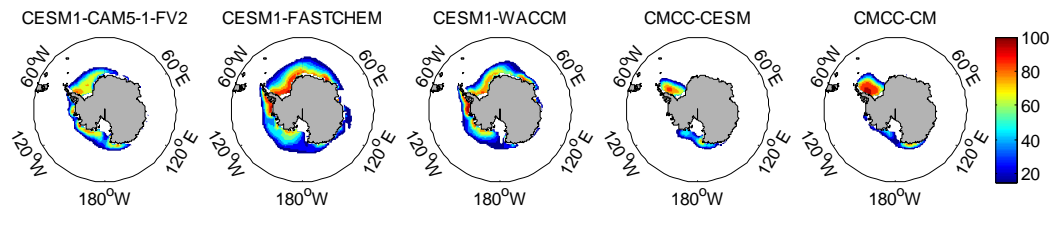

19

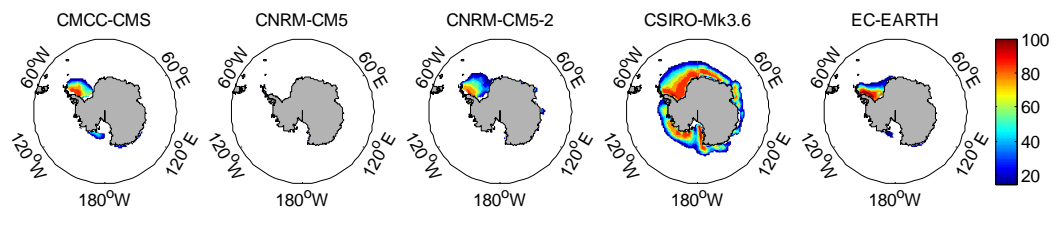

20

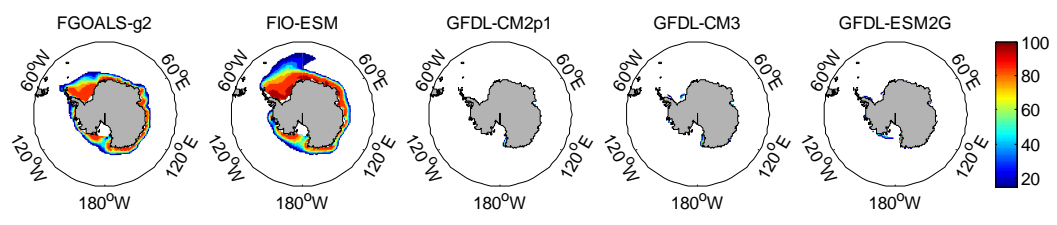

21

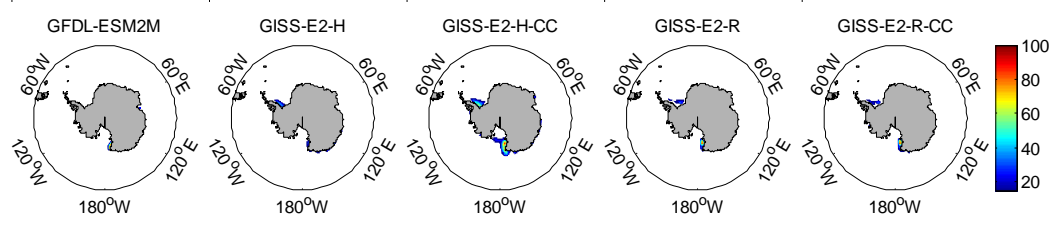

22

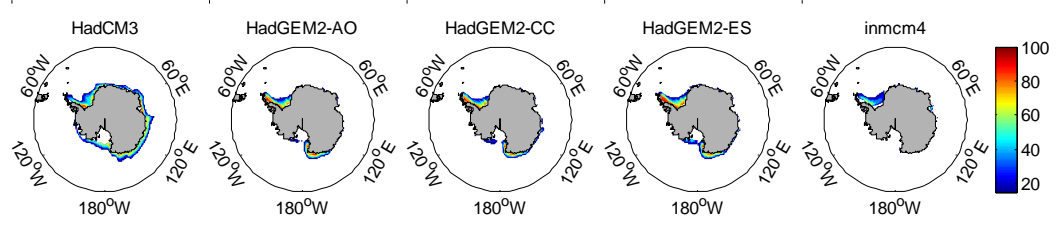

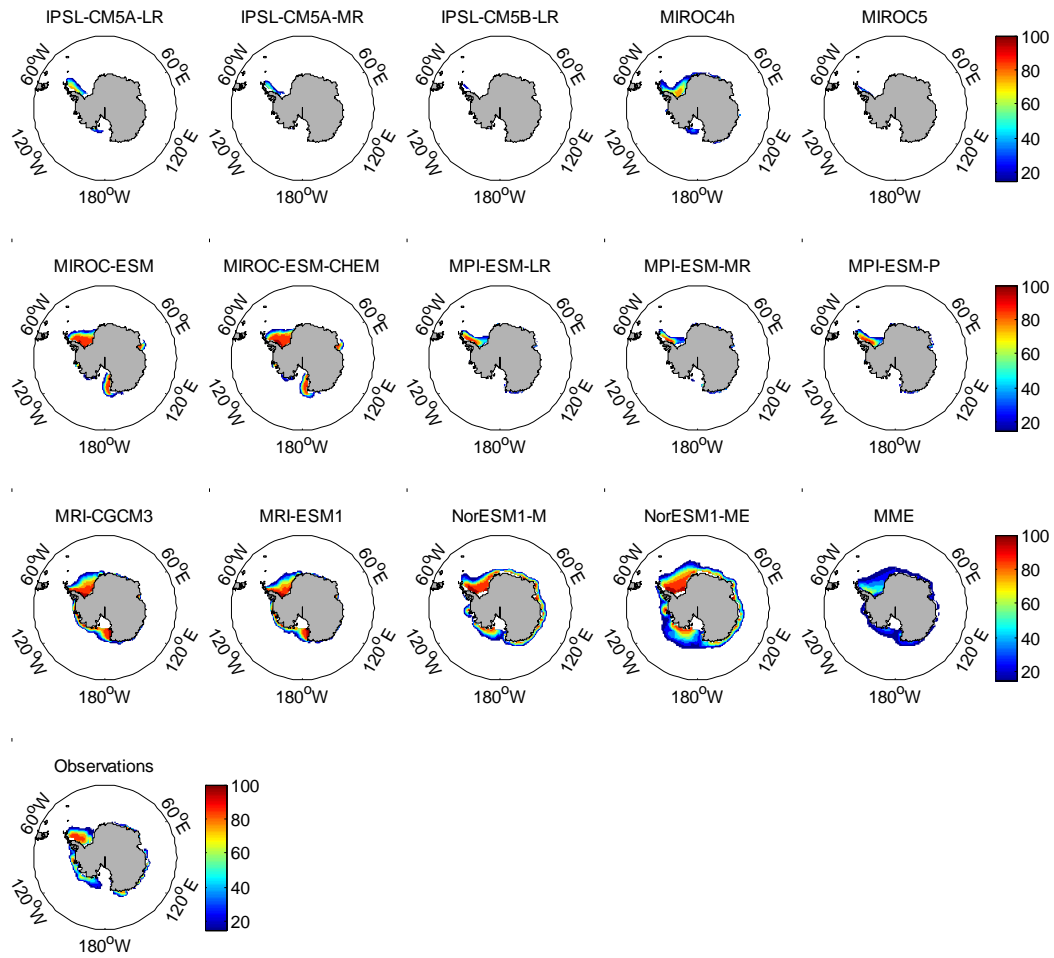

23

24

25

26

27 Figure S3. CMIP5-simulated and satellite-observed Antarctic sea ice concentration in  
 28 February during 1979-2005 (units: %).

29

30

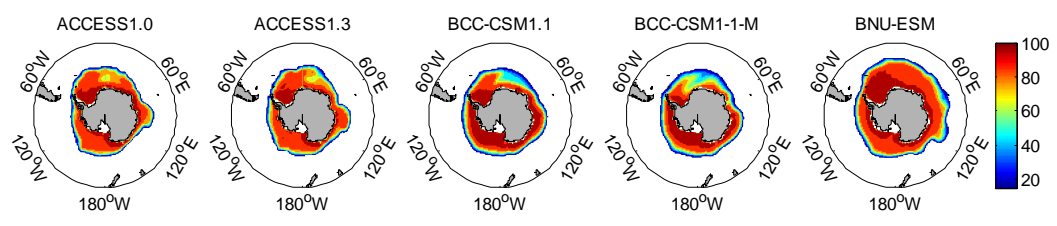

31

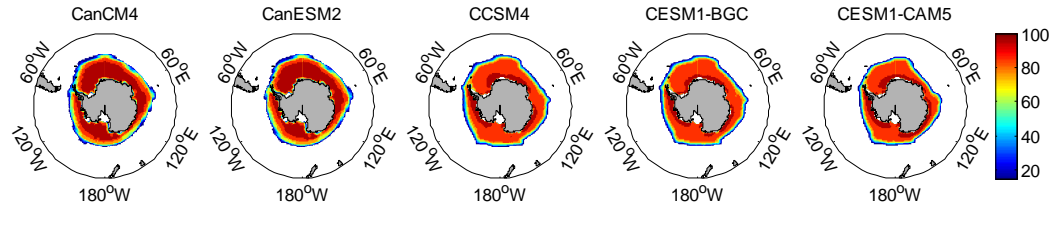

32

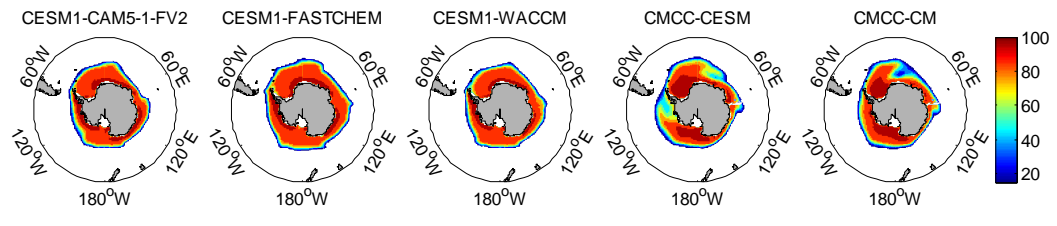

33

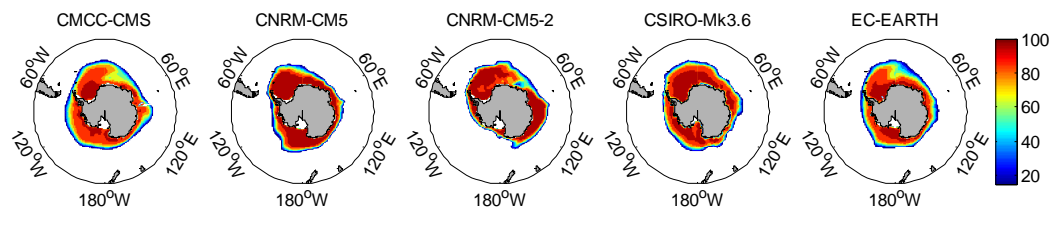

34

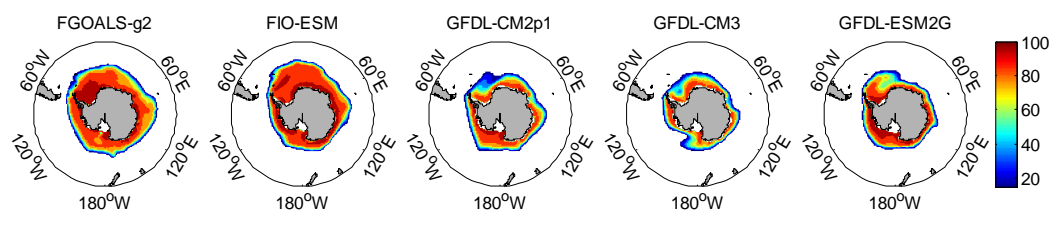

35

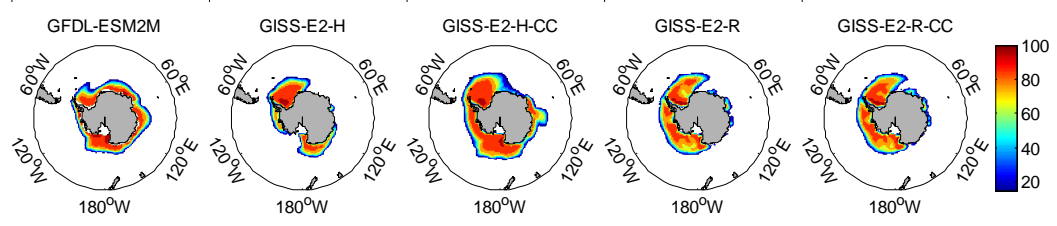

36

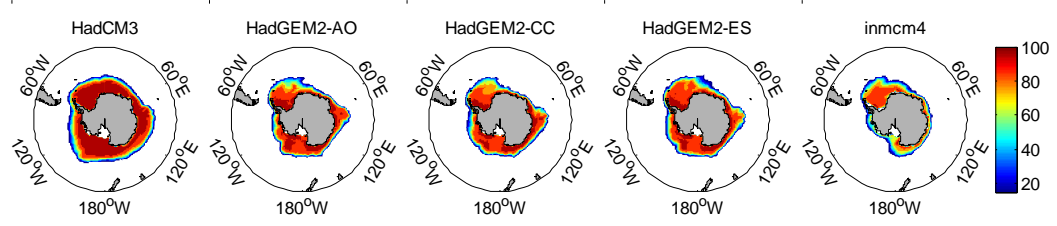

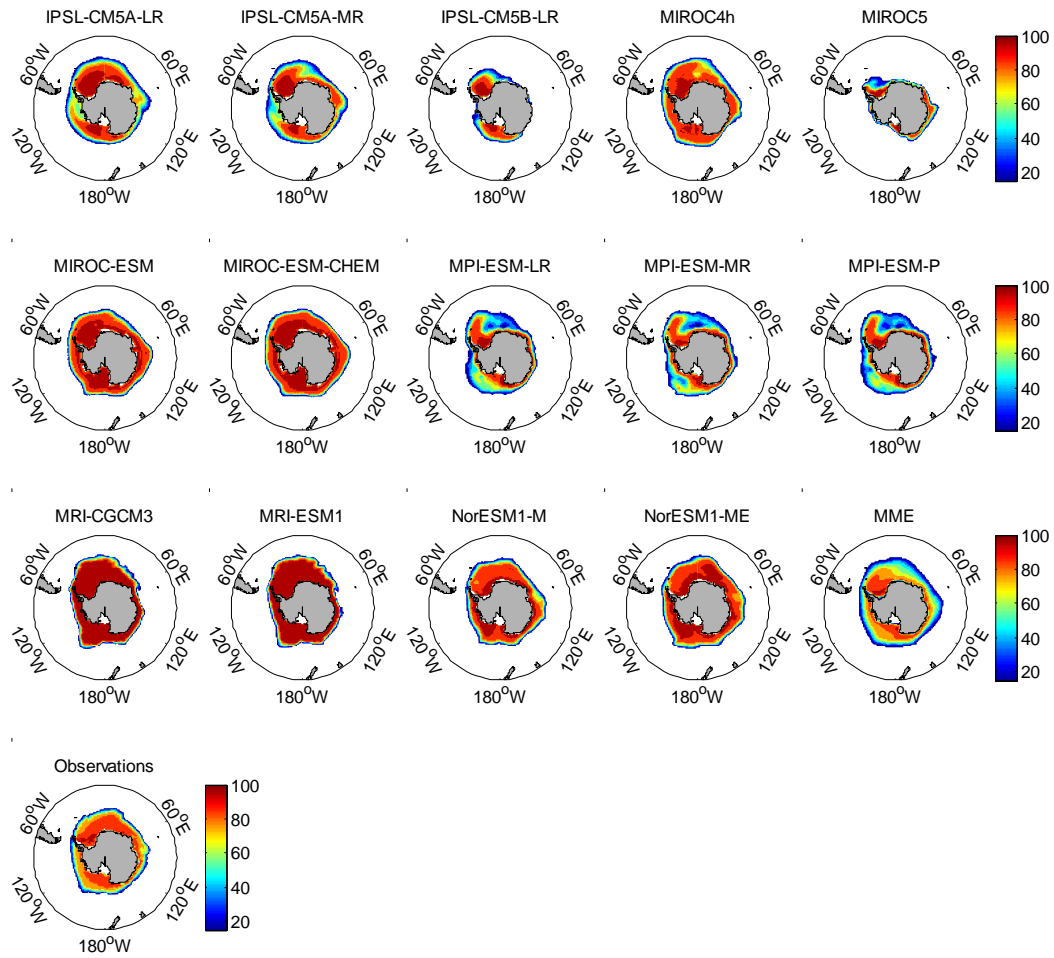

41 Figure S4. CMIP5-simulated and satellite-observed Antarctic sea ice concentration in  
 42 September during 1979-2005 (units: %).

43

44

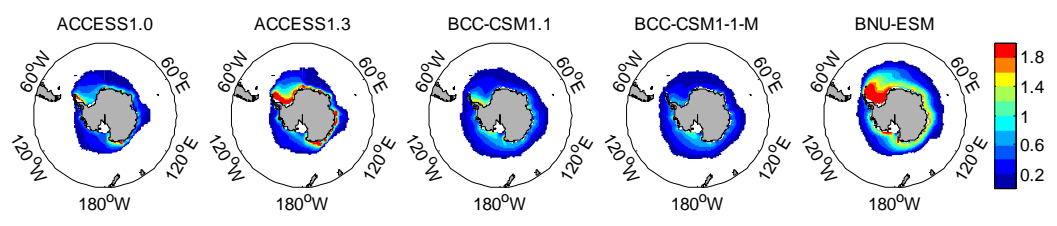

45

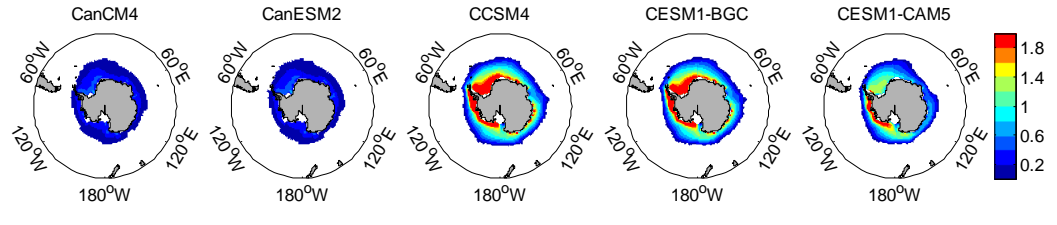

46

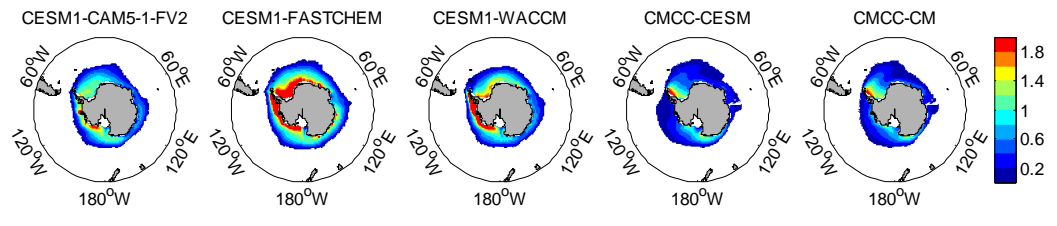

47

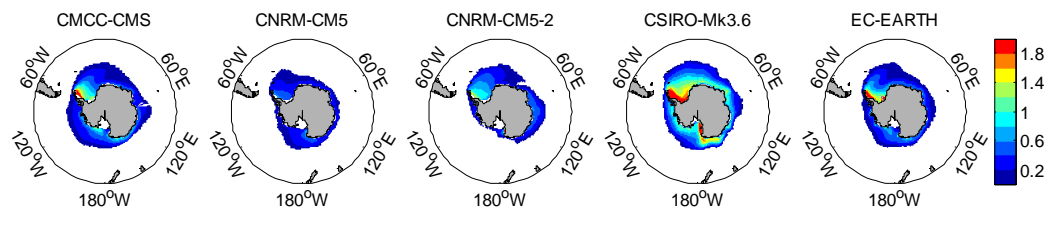

48

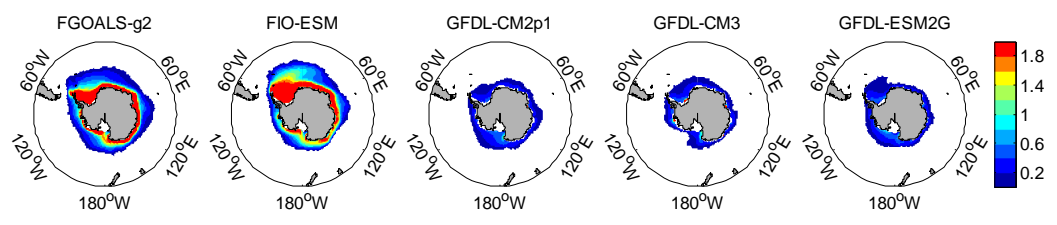

49

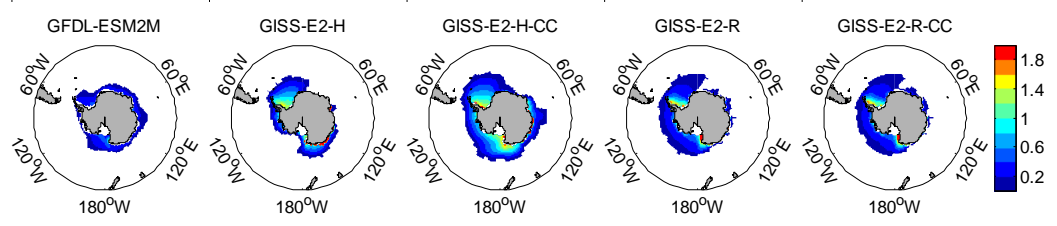

50

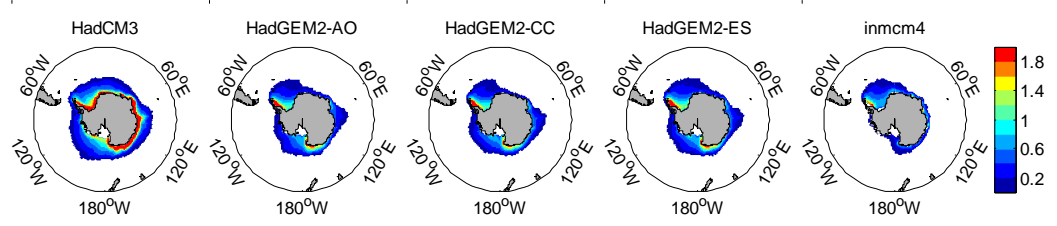



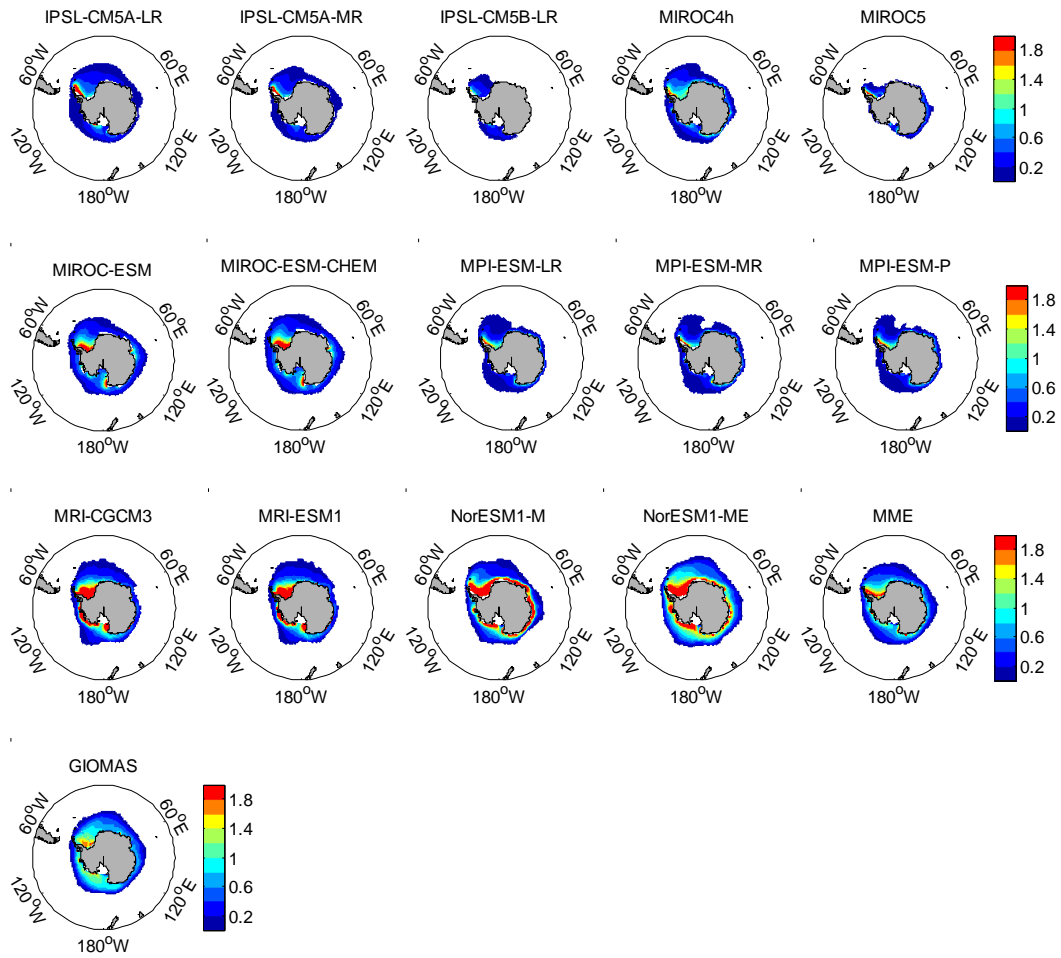

51

52

53

54

55 Figure S5. CMIP5-simulated and GIOMAS Antarctic sea ice thickness during

56 1979-2005 (units: m).

57

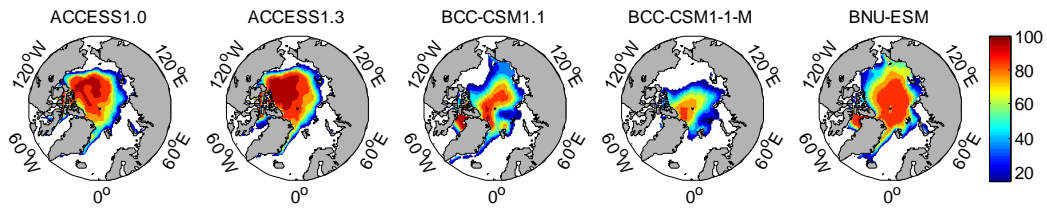

58

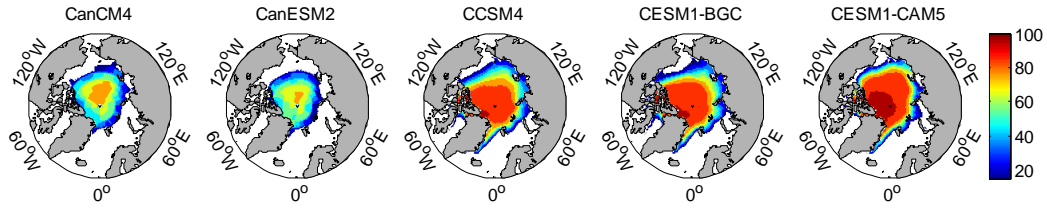

59

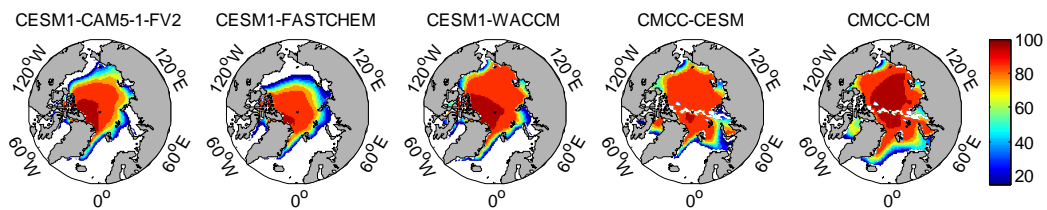

60

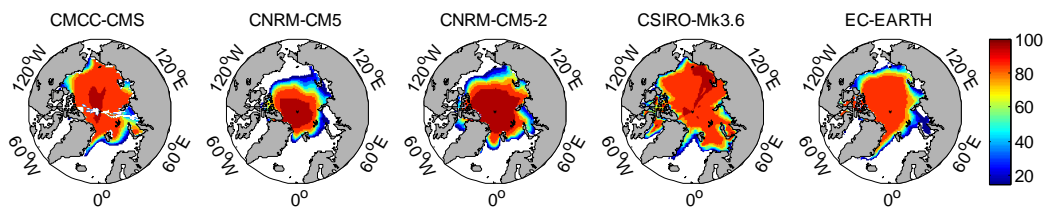

61

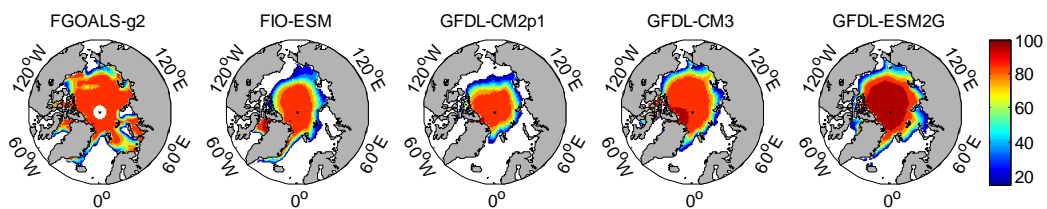

62

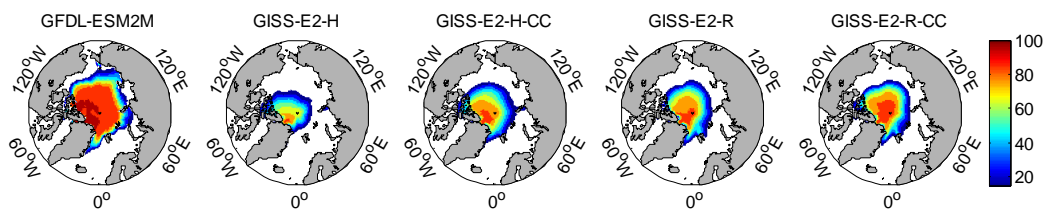

63

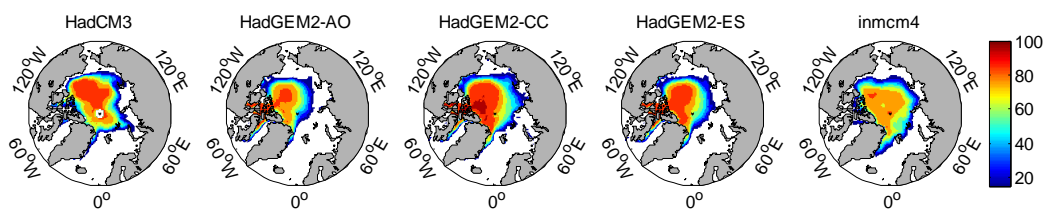

64

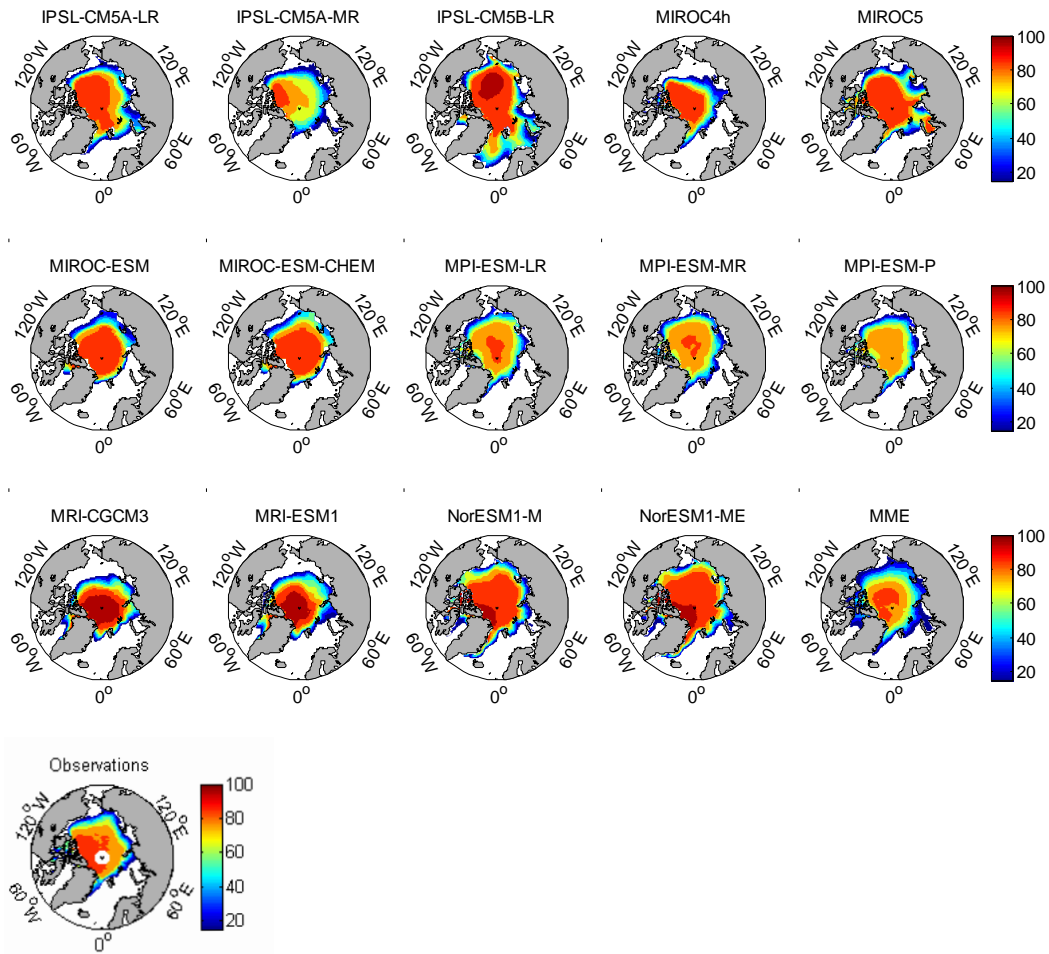

65

66

67

68

69 Figure S6. CMIP5-simulated and satellite-observed Arctic sea ice concentration in  
 70 September during 1979-2005 (units: %).

71

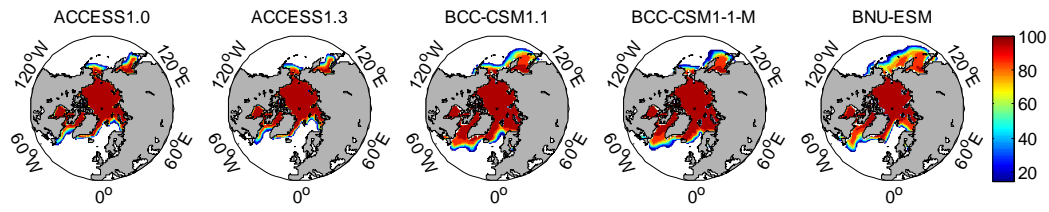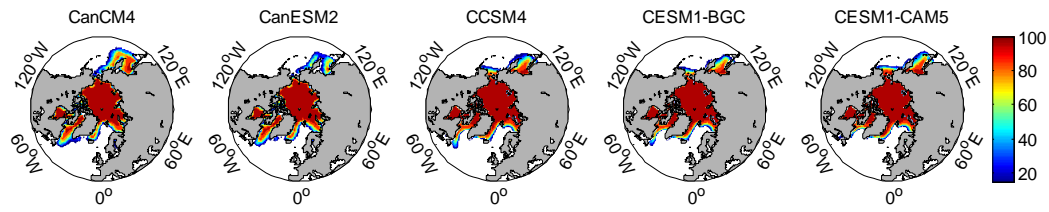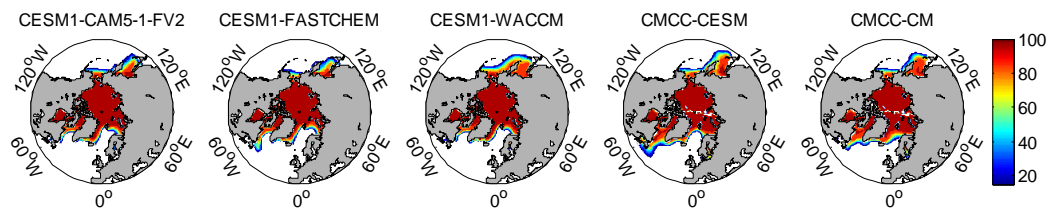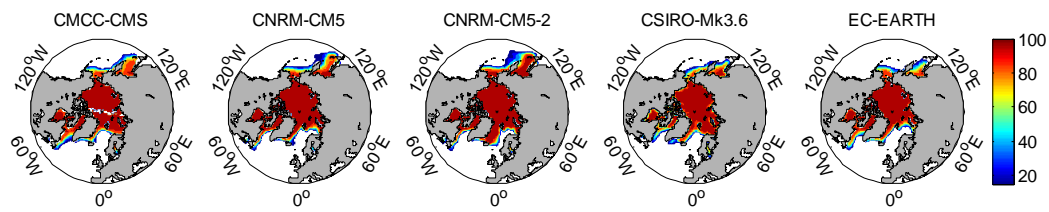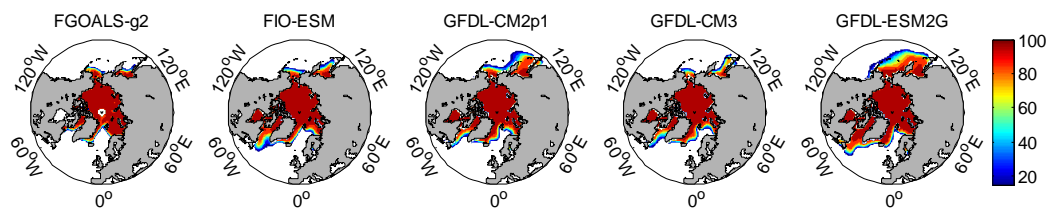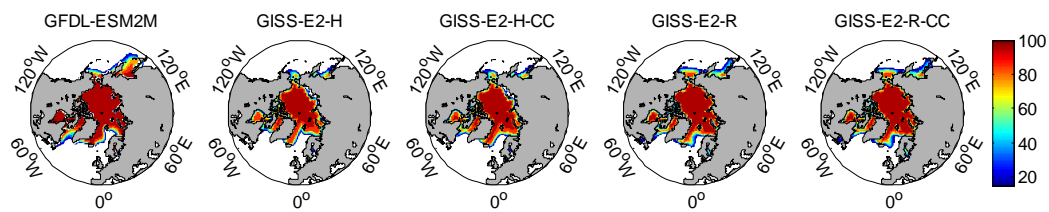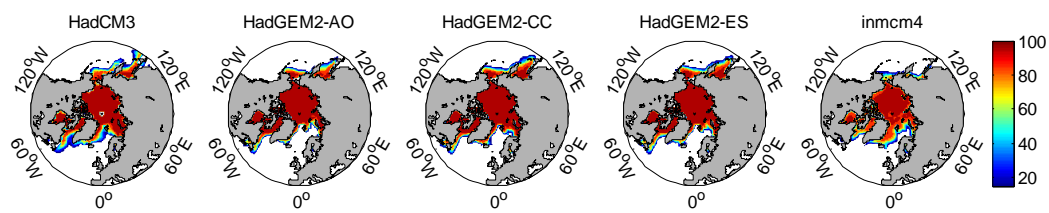

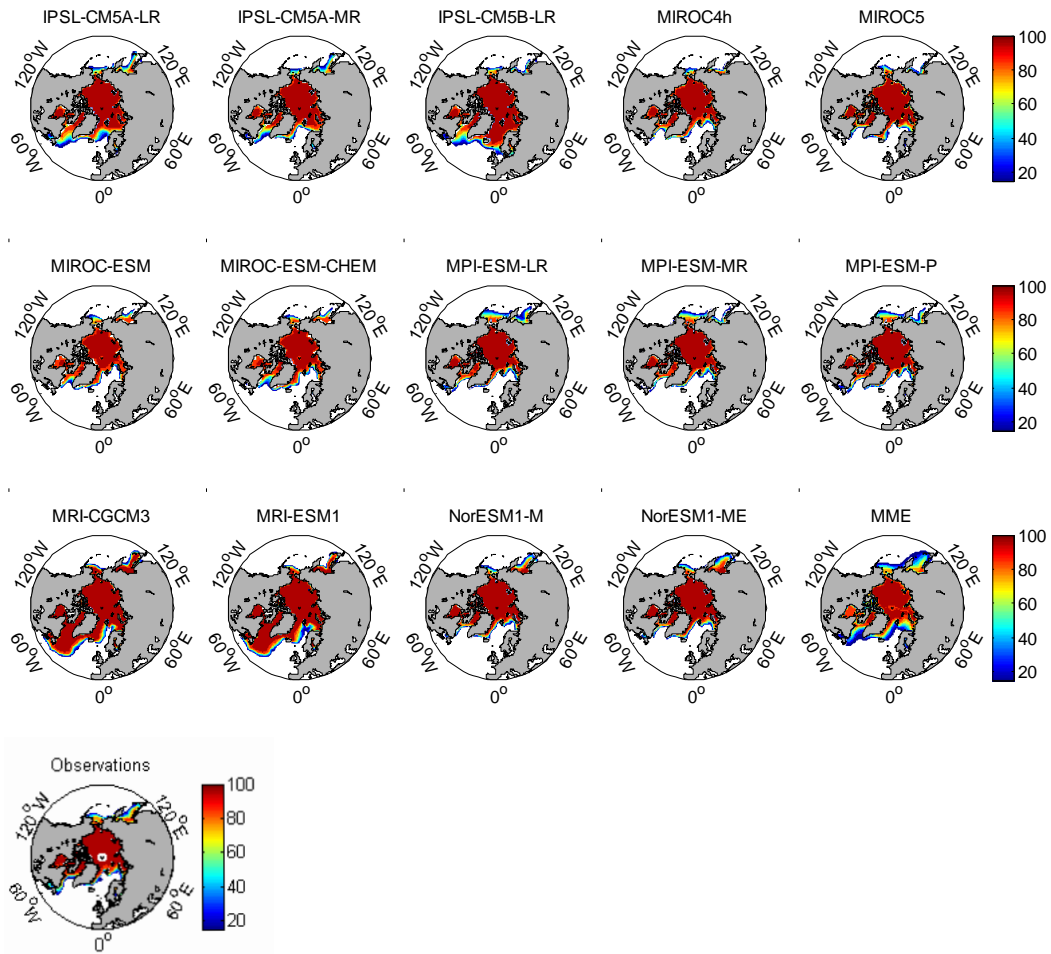

79

80

81

82

83 Figure S7. CMIP5-simulated and satellite-observed Arctic sea ice concentration in  
 84 March during 1979-2005 (units: %).

85

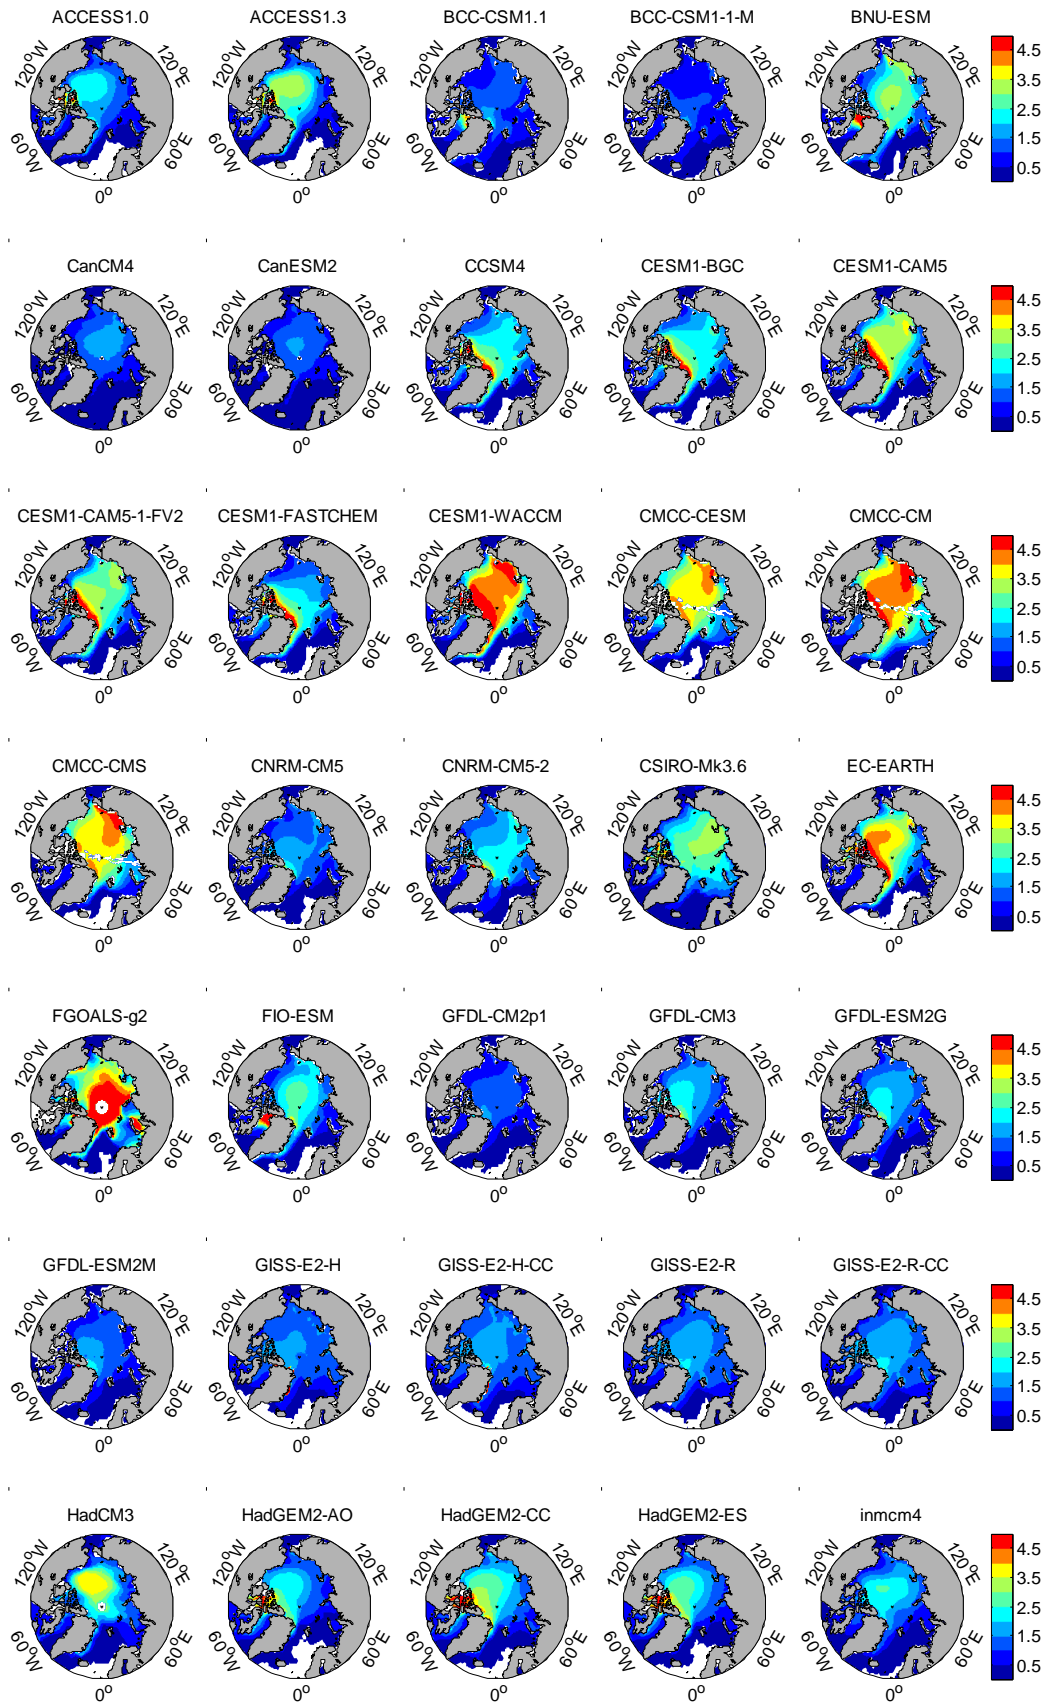



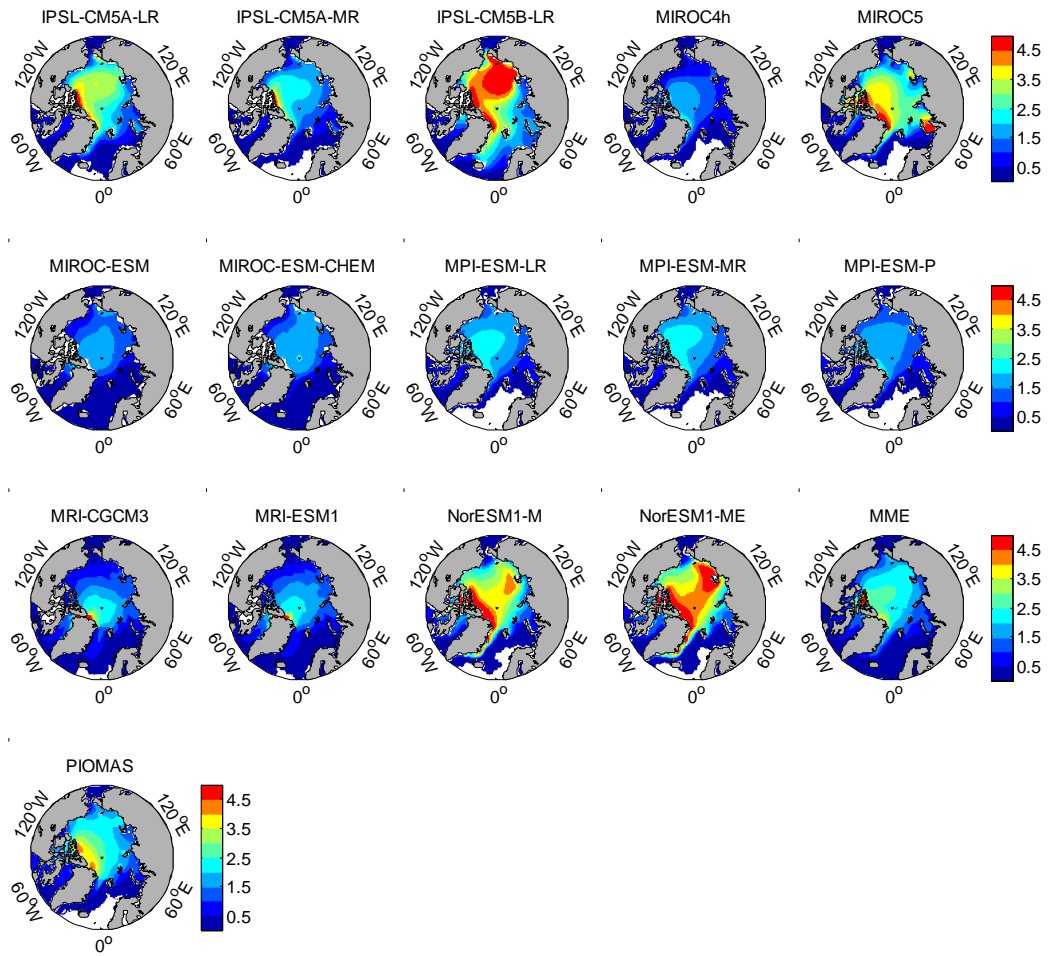

Figure S8. CMIP5-simulated and PIOMAS Arctic sea ice thickness during 1979-2005 (units: m).
